# Supplementary material for: Unraveling the photophysical and semiconducting properties of color converter luminogens with aggregation induced emission characteristics
Source: Royal Society of Chemistry journal article supplement (doi:10.1039/d0tc03632c), 2020-01-01
Supplement: d0tc03632c1.pdf [file d0tc03632c1.pdf]

## SUPPORTING INFORMATION

### Unraveling the photophysical and semiconducting properties of color converter luminogens with aggregation induced emission characteristics

M. Paz Fernández-Liencrees,<sup>a</sup> Mónica Moral,<sup>b</sup> Yilin Zhang,<sup>c</sup> Ting Han,<sup>d</sup> Meijuan Jiang,<sup>d</sup> Andrés Garzón-  
Ruiz,<sup>e,\*</sup> Amparo Navarro,<sup>a,\*</sup> Kam Sing Wong,<sup>c</sup> Ben Zhong Tang,<sup>d,\*</sup>

<sup>a</sup>*Department of Physical and Analytical Chemistry, Faculty of Experimental Sciences, Universidad de Jaén, Campus Las Lagunillas, E23071 Jaén, Spain. Email: [anavarro@ujaen.es](mailto:anavarro@ujaen.es)*

<sup>b</sup>*Renewable Energy Research Institute, University of Castilla-La Mancha, Paseo de la Investigación 1, 02071 Albacete, Spain*

<sup>c</sup> *Department of Physics, the Hong Kong University of Science and Technology, Clear Water Bay, Kowloon, Hong Kong*

<sup>d</sup> *Department of Chemistry, Hong Kong Branch of Chinese National Engineering Research Center for Tissue Restoration and Reconstruction, Institute for Advanced Study and Department of Chemical and Biological Engineering, The Hong Kong University of Science and Technology, Clear Water Bay, Kowloon, Hong Kong. Email: [tangbenz@ust.hk](mailto:tangbenz@ust.hk)*

<sup>e</sup>*Department of Physical Chemistry, Faculty of Pharmacy, Universidad de Castilla-La Mancha, Cronista Francisco Ballesteros Gómez, 1, E02071 Albacete, Spain. Email: [Andres.Garzon@uclm.es](mailto:Andres.Garzon@uclm.es)*

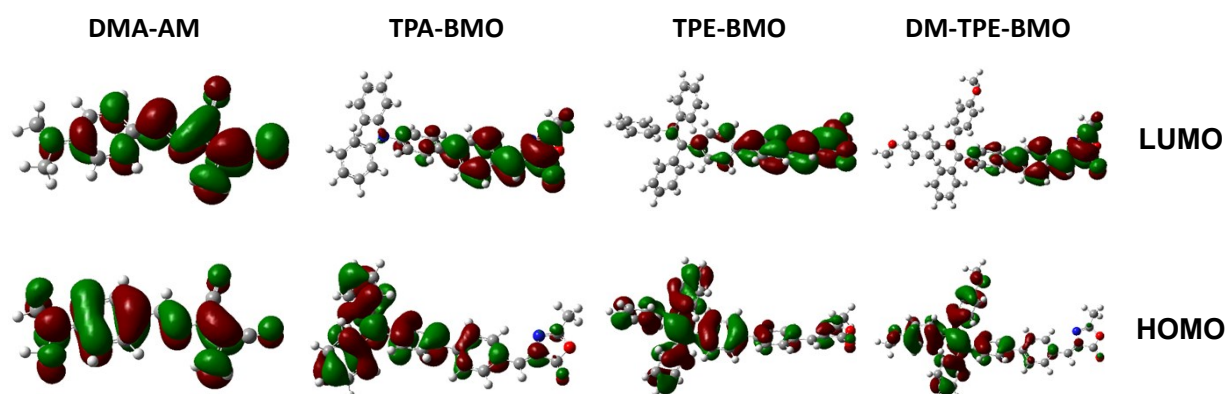

**Figure S1.** Shapes of HOMO and LUMO of the studied compounds calculated at the PBE0/6-31G\*\* level in THF solution (isocontour plots, 0.02 au).

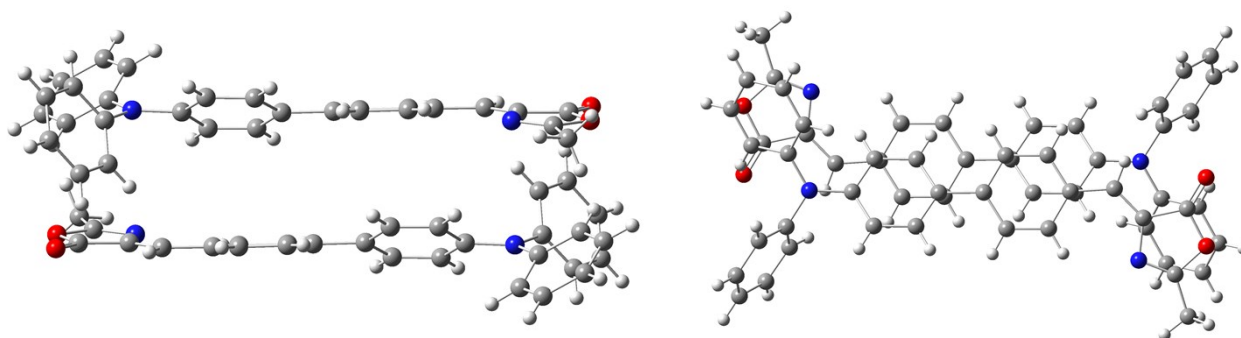

**Figure S2.**  $\pi$ -stacking arrangement in the TPA-BMO crystal.

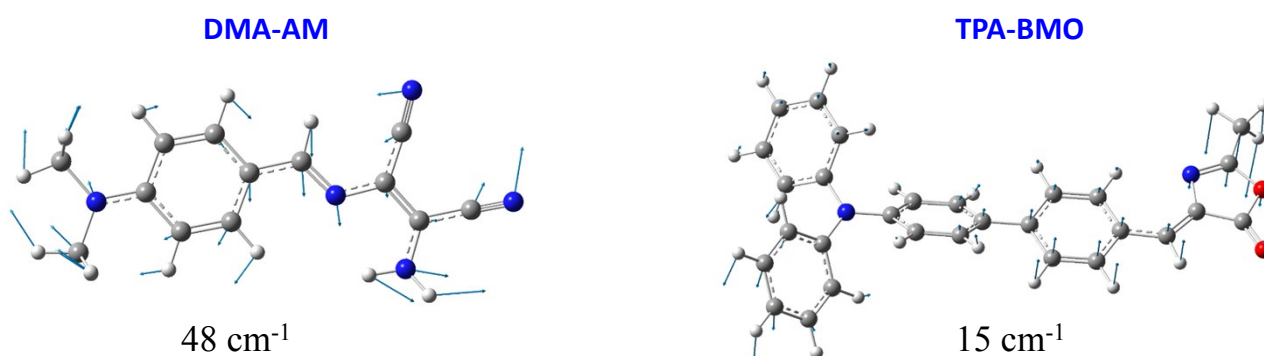

**Figure S3.** Atomic displacements of some selected normal modes (corresponding to high HR factor values) calculated for DMA-AM and TPA-BMO in THF solution at the PBE0/6-31G\*\* level of theory.

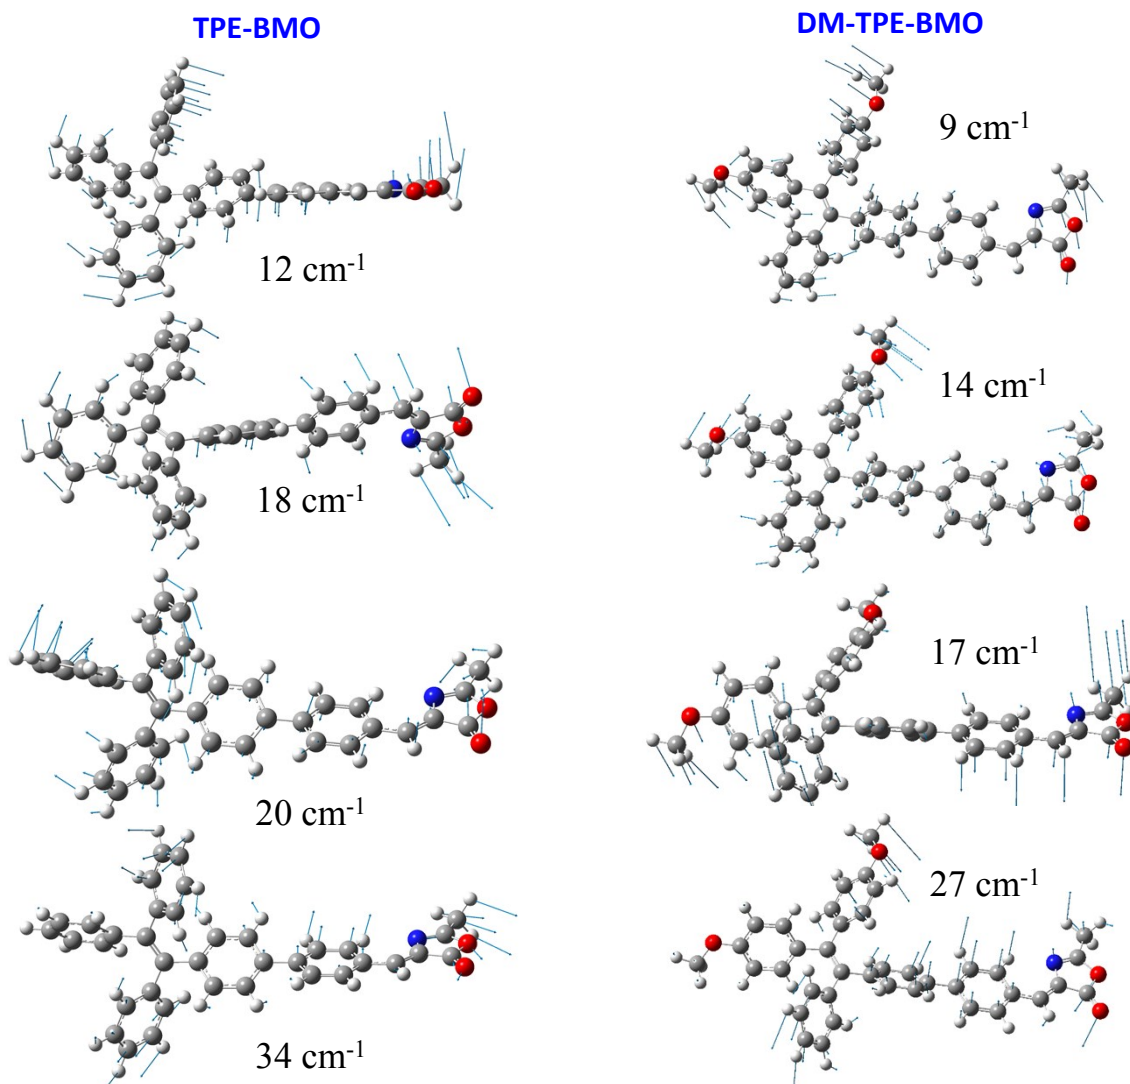

**Figure S4.** Atomic displacements of some selected normal modes (corresponding to high HR factor values) calculated for TPE-BMO and DM-TPE-BMO in THF solution at the PBE0/6-31G\*\* level of theory.

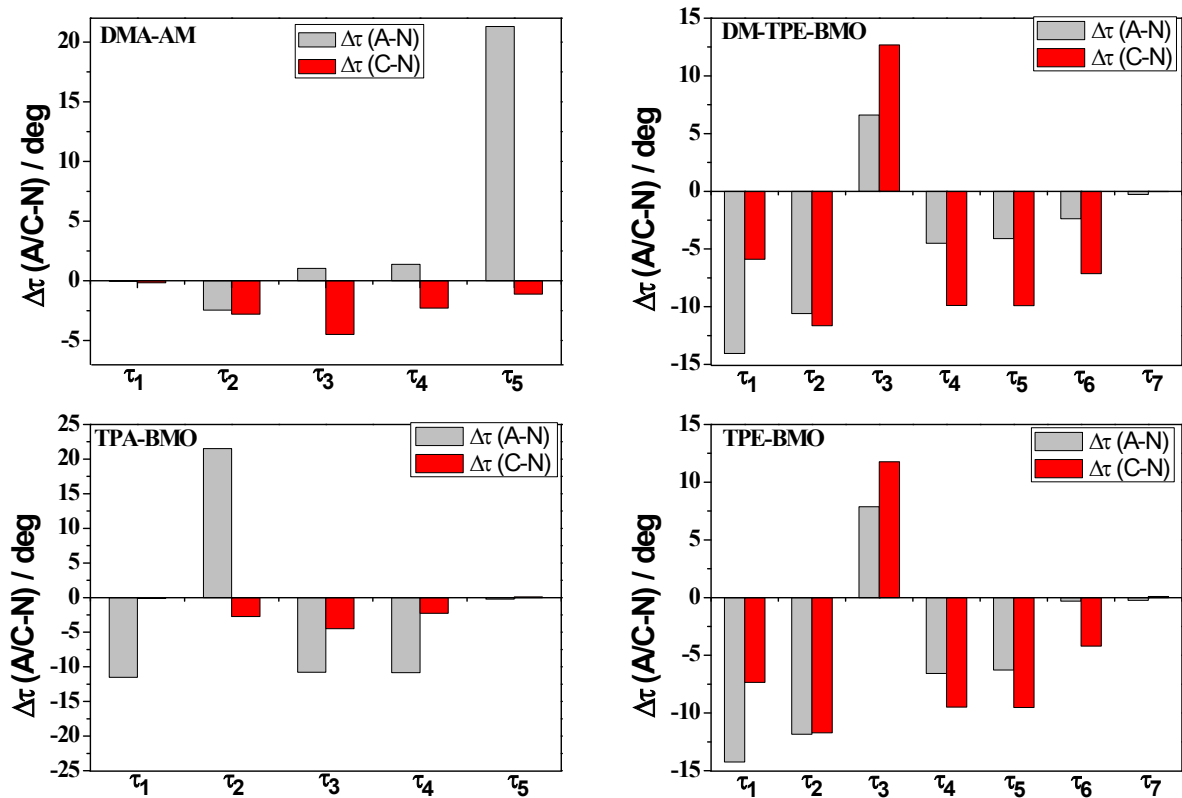

**Figure S5.** Variation of selected dihedral angles from neutral form (N) to anionic state (A) or cationic state (C) calculated at the B3LYP/6-31G\*\* level of theory in the gas phase.

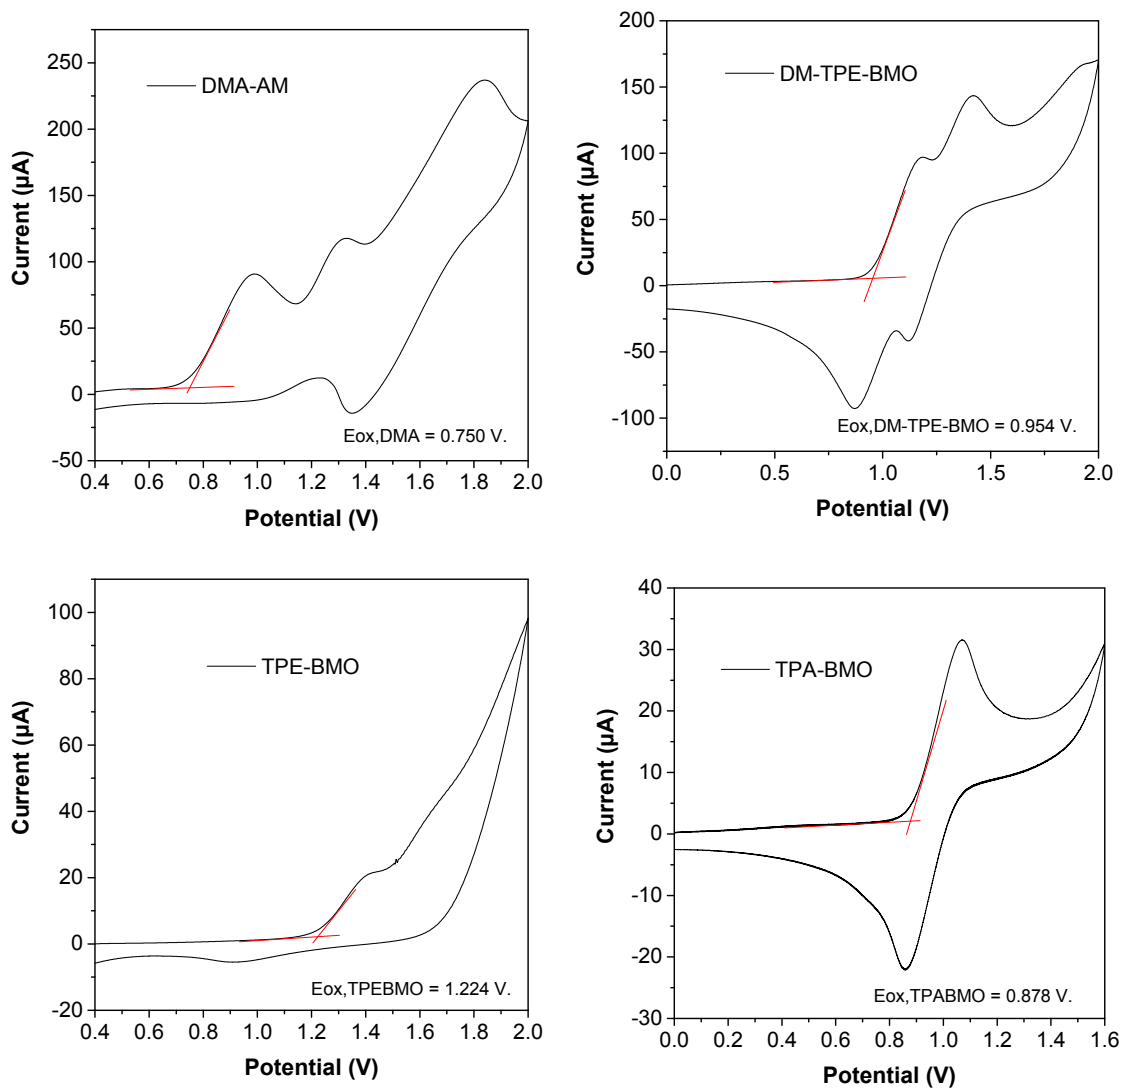

**Figure S6.** Cyclic voltammogram curves obtained for DMA-AM, TPA-BMO, TPE-BMO, and DM-TPE-BMO.

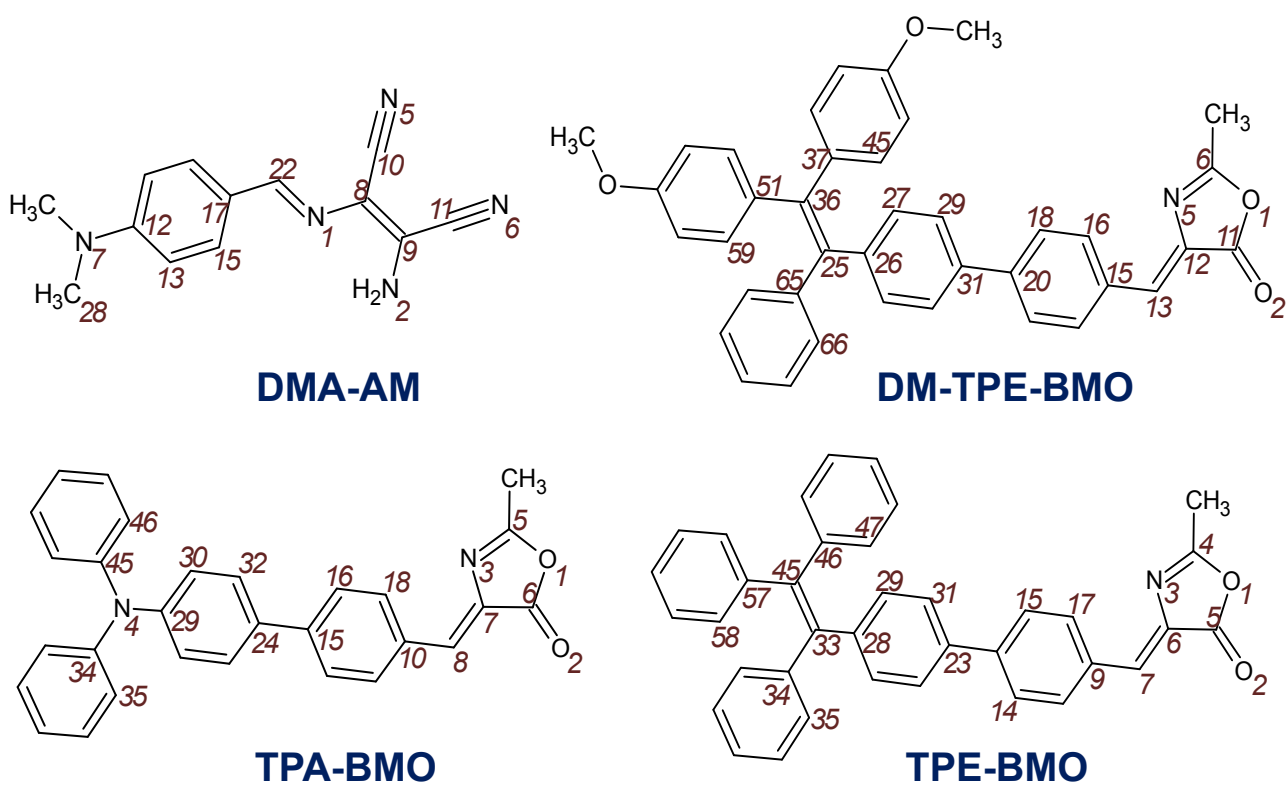

**Figure S7.** Molecular structures and the numbering of selected atoms for the investigated molecules.

**Table S1.** Selected structural parameters (bond lengths in Å, bond angles in degrees and inter-ring dihedral angles in degrees) calculated for the S<sub>0</sub> and S<sub>1</sub> states in THF solution at the PBE0/6-31G\*\* level of theory (atom numbering is shown in **Figure 1**).  $|\Delta(S_1-S_0)|$  is the numerical difference between a structural parameter calculated for the molecule in excited state with respect to the ground state. The numbering of atoms is shown in Figure S7.

| Compound     | BOND LENGTH           |                |                     | BOND ANGLE     |                    |                     | DIHEDRAL ANGLE |                |                               |        |        |        |
|--------------|-----------------------|----------------|---------------------|----------------|--------------------|---------------------|----------------|----------------|-------------------------------|--------|--------|--------|
|              | S <sub>0</sub>        | S <sub>1</sub> | $ \Delta(S_1-S_0) $ | S <sub>0</sub> | S <sub>1</sub>     | $ \Delta(S_1-S_0) $ | S <sub>0</sub> | S <sub>1</sub> | $ \Delta(S_1-S_0) $           |        |        |        |
| DMA-AM       | <i>C17-C22</i>        | 1.440          | 1.432               | 0.008          | <i>C17-C22-N1</i>  | 123.09              | 120.81         | 2.28           | <i>C15-C17-C22-N1</i>         | -0.18  | -0.55  | 0.37*  |
|              | <i>C22-N1</i>         | 1.293          | 1.321               | 0.028          | <i>C22-N1-C8</i>   | 120.87              | 122.84         | 1.97           | <i>C22-N1-C8-C10</i>          | 1.82   | -0.06  | 1.88   |
|              | <i>N1-C8</i>          | 1.379          | 1.345               | 0.034          | <i>N1-C8-C9</i>    | 117.58              | 117.93         | 0.35           | <i>N1-C8-C9-N2</i>            | 3.82   | 4.01   | 0.19*  |
|              | <i>C8-C10</i>         | 1.427          | 1.422               | 0.005          | <i>N1-C8-C10</i>   | 122.50              | 122.63         | 0.13           | <i>C10-C8-C9-C11</i>          | 1.50   | 1.73   | 0.23*  |
|              | <i>C8-C9</i>          | 1.379          | 1.429               | 0.050          | <i>C8-C9-C11</i>   | 120.12              | 121.73         | 1.61           | <i>C13-C12-N7-C28</i>         | -0.22  | 0.11   | 0.33   |
|              | <i>C9-C11</i>         | 1.429          | 1.403               | 0.026          | <i>C8-C9-N2</i>    | 122.22              | 118.39         | 3.83           |                               |        |        |        |
|              | <i>C9-N2</i>          | 1.357          | 1.362               | 0.005          | <i>C20-C12-N7</i>  | 121.33              | 121.07         | 0.26           |                               |        |        |        |
|              | <i>C12-N7</i>         | 1.362          | 1.362               | 0.000          | <i>C12-N7-C28</i>  | 120.30              | 120.40         | 0.10           |                               |        |        |        |
| TPA-BMO      | <b><i>C24-C15</i></b> | 1.472          | 1.459               | 0.013          | <i>C24-C15-C16</i> | 121.11              | 121.61         | 0.50           | <b><i>C32-C24-C15-C16</i></b> | 32.14  | 25.40  | 6.74   |
|              | <i>C29-N4</i>         | 1.404          | 1.403               | 0.001          | <i>C30-C29-N4</i>  | 120.86              | 120.40         | 0.46           | <i>C30-C29-N4-C45</i>         | -34.42 | -39.18 | 4.76*  |
|              | <i>N4-C45</i>         | 1.416          | 1.405               | 0.011          | <i>C29-N4-C45</i>  | 120.42              | 119.89         | 0.53           | <i>C29-N4-C45-C46</i>         | -43.29 | -37.52 | 5.77   |
|              | <i>N4-C34</i>         | 1.416          | 1.405               | 0.011          | <i>C29-N4-C34</i>  | 120.39              | 119.86         | 0.53           | <i>C29-N4-C34-C35</i>         | -43.69 | -37.62 | 6.07   |
|              | <i>C10-C8</i>         | 1.444          | 1.420               | 0.024          | <i>C10-C8-C7</i>   | 129.70              | 129.43         | 0.27           | <i>C18-C10-C8-C7</i>          | 0.50   | -0.85  | 1.35*  |
|              | <b><i>C8-C7</i></b>   | 1.356          | 1.392               | 0.036          | <i>C8-C7-C6</i>    | 122.26              | 122.85         | 0.59           |                               |        |        |        |
|              | <i>C7-C6</i>          | 1.472          | 1.443               | 0.029          | <i>C7-C6-O2</i>    | 133.46              | 134.58         | 1.12           |                               |        |        |        |
|              | <i>C7-N3</i>          | 1.396          | 1.391               | 0.005          | <i>C8-C7-N3</i>    | 129.38              | 128.39         | 0.99           |                               |        |        |        |
| <i>C6-O2</i> | 1.203                 | 1.221          | 0.018               |                |                    |                     |                |                |                               |        |        |        |
| TPE-BMO      | <i>C23-C14</i>        | 1.475          | 1.449               | 0.026          | <i>C31-C23-C14</i> | 121.09              | 121.80         | 0.71           | <i>C31-C23-C14-C15</i>        | -34.02 | -18.83 | 15.19  |
|              | <i>C28-C33</i>        | 1.486          | 1.440               | 0.046          | <i>C29-C28-C33</i> | 121.46              | 121.87         | 0.41           | <i>C29-C28-C33-C45</i>        | -48.09 | -30.08 | 18.01  |
|              | <i>C33-C45</i>        | 1.363          | 1.425               | 0.062          | <i>C28-C33-C45</i> | 122.56              | 121.72         | 0.84           | <i>C28-C33-C45-C46</i>        | -12.22 | -29.54 | 17.32* |
|              | <i>C33-C34</i>        | 1.488          | 1.471               | 0.017          | <i>C33-C45-C46</i> | 122.53              | 121.02         | 1.51           | <i>C33-C45-C46-C47</i>        | -48.96 | -34.60 | 14.36  |
|              | <i>C9-C7</i>          | 1.445          | 1.421               | 0.024          | <i>C33-C45-C57</i> | 122.57              | 120.73         | 1.84           | <i>C33-C45-C57-C58</i>        | -48.77 | -35.94 | 12.83  |
|              | <i>C7-C6</i>          | 1.355          | 1.382               | 0.027          | <i>C28-C33-C34</i> | 114.83              | 118.25         | 3.42           | <i>C28-C33-C34-C35</i>        | -46.64 | -39.08 | 7.56   |
|              | <i>C6-C5</i>          | 1.472          | 1.450               | 0.022          | <i>C17-C9-C7</i>   | 123.67              | 124.12         | 0.45           | <i>C17-C9-C7-C6</i>           | 0.12   | 0.44   | 0.32*  |
|              | <i>C6-N3</i>          | 1.396          | 1.393               | 0.003          | <i>C7-C6-C5</i>    | 122.25              | 122.61         | 0.36           |                               |        |        |        |
|              | <i>C5-O2</i>          | 1.203          | 1.215               | 0.012          | <i>C7-C6-N3</i>    | 129.41              | 128.69         | 0.72           |                               |        |        |        |
| DM-TPE-BMO   | <i>C31-C20</i>        | 1.475          | 1.455               | 0.020          | <i>C29-C31-C20</i> | 121.08              | 121.63         | 0.55           | <b><i>C29-C31-C20-C18</i></b> | 33.59  | 22.38  | 11.21  |
|              | <i>C26-C25</i>        | 1.485          | 1.419               | 0.066          | <i>C27-C26-C25</i> | 121.51              | 121.63         | 0.12           | <i>C27-C26-C25-C36</i>        | -46.86 | -32.77 | 14.09  |
|              | <i>C25=C36</i>        | 1.366          | 1.449               | 0.083          | <i>C26-C25-C36</i> | 122.60              | 121.62         | 0.98           | <i>C26-C25-C36-C37</i>        | -13.48 | -27.62 | 14.14* |
|              | <i>C25-C65</i>        | 1.488          | 1.469               | 0.019          | <i>C25-C36-C37</i> | 122.45              | 121.22         | 1.23           | <i>C25-C36-C37-C45</i>        | -46.23 | -35.44 | 10.79  |
|              | <i>C15-C13</i>        | 1.445          | 1.420               | 0.025          | <i>C25-C36-C51</i> | 122.37              | 120.89         | 1.48           | <i>C25-C36-C51-C59</i>        | -47.03 | -36.47 | 10.56  |
|              | <i>C13-C12</i>        | 1.355          | 1.387               | 0.032          | <i>C26-C25-C65</i> | 114.82              | 117.88         | 3.06           | <i>C26-C25-C65-C66</i>        | -46.56 | -38.20 | 8.36   |
|              | <i>C12-C11</i>        | 1.472          | 1.445               | 0.027          | <i>C16-C15-C13</i> | 123.65              | 124.16         | 0.51           | <i>C16-C15-C13-C12</i>        | -0.06  | -0.09  | 0.03*  |
|              | <i>C12-N5</i>         | 1.396          | 1.393               | 0.020          | <i>C13-C12-C11</i> | 122.26              | 122.75         | 0.49           |                               |        |        |        |
|              | <i>C11-O2</i>         | 1.203          | 1.219               | 0.066          | <i>C13-C12-N5</i>  | 129.39              | 128.50         | 0.89           |                               |        |        |        |

\* The dihedral angle increases after excitation.

**Table S2.** Selected structural parameters (bond lengths in Å, bond angles in degrees and inter-ring dihedral angles in degrees) calculated for the S<sub>0</sub> and S<sub>1</sub> states in solid phase at the PBE0/6-31G\*\*//UFF level of theory (atom numbering shown in **Figure 1**).  $|\Delta(S_1-S_0)|$  is the numerical difference between a structural parameter calculated for the molecule in excited state with respect to the ground state. The numbering of atoms is shown in Figure S7.

| Compound | BOND LENGTH |  |  | BOND ANGLE |  |  | DIHEDRAL ANGLE |  |  |
|----------|-------------|--|--|------------|--|--|----------------|--|--|
|----------|-------------|--|--|------------|--|--|----------------|--|--|

|             |                | $S_0$         |       |                     | $S_1$              |                   |                     | $ \Delta(S_1-S_0) $ |                        | $S_0$  |        |                     | $S_1$  |  |  | $ \Delta(S_1-S_0) $ | Crystal <sup>a</sup> |
|-------------|----------------|---------------|-------|---------------------|--------------------|-------------------|---------------------|---------------------|------------------------|--------|--------|---------------------|--------|--|--|---------------------|----------------------|
|             |                | $S_0$         | $S_1$ | $ \Delta(S_1-S_0) $ | $S_0$              | $S_1$             | $ \Delta(S_1-S_0) $ |                     |                        | $S_0$  | $S_1$  | $ \Delta(S_1-S_0) $ |        |  |  |                     |                      |
| DMA-AM      | <i>C17-C22</i> | 1.439         | 1.430 | 0.009               | <i>C17-C22-N1</i>  | 123.63            | 121.80              | 1.83                | <i>C15-C17-C22-N1</i>  | 3.34   | 2.31   | 1.03                | 1.65   |  |  |                     |                      |
|             | <i>C22-N1</i>  | 1.289         | 1.318 | 0.029               | <i>C22-N1-C8</i>   | 119.55            | 120.43              | 0.88                | <i>C22-N1-C8-C10</i>   | 4.09   | 4.05   | 0.04                | -2.07  |  |  |                     |                      |
|             | <i>N1-C8</i>   | 1.381         | 1.351 | 0.030               | <i>N1-C8-C9</i>    | 117.53            | 117.68              | 0.15                | <i>N1-C8-C9-N2</i>     | -4.32  | -5.19  | 0.87*               | 3.11   |  |  |                     |                      |
|             | <i>C8-C10</i>  | 1.425         | 1.419 | 0.006               | <i>N1-C8-C10</i>   | 121.50            | 121.75              | 0.25                | <i>C10-C8-C9-C11</i>   | -3.59  | -5.12  | 1.53*               | 0.78   |  |  |                     |                      |
|             | <i>C8-C9</i>   | 1.372         | 1.418 | 0.046               | <i>C8-C9-C11</i>   | 120.99            | 122.79              | 1.80                | <i>C13-C12-N7-C28</i>  | 13.41  | 11.99  | 1.42                | 14.15  |  |  |                     |                      |
|             | <i>C9-C11</i>  | 1.423         | 1.402 | 0.021               | <i>C8-C9-N2</i>    | 121.64            | 117.26              | 4.38                |                        |        |        |                     |        |  |  |                     |                      |
|             | <i>C9-N2</i>   | 1.361         | 1.358 | 0.003               | <i>C20-C12-N7</i>  | 120.89            | 120.28              | 0.61                |                        |        |        |                     |        |  |  |                     |                      |
|             | <i>C12-N7</i>  | 1.369         | 1.373 | 0.004               | <i>C12-N7-C28</i>  | 120.14            | 120.32              | 0.18                |                        |        |        |                     |        |  |  |                     |                      |
| TPA-BMO     | <i>C24-C15</i> | 1.473         | 1.472 | 0.001               | <i>C24-C15-C16</i> | 121.42            | 121.81              | 0.39                | <i>C32-C24-C15-C16</i> | 25.54  | 26.87  | 1.33*               | 21.56  |  |  |                     |                      |
|             | <i>C29-N4</i>  | 1.403         | 1.418 | 0.015               | <i>C30-C29-N4</i>  | 121.74            | 121.11              | 0.63                | <i>C30-C29-N4-C45</i>  | -33.57 | -37.05 | 3.48*               | -36.06 |  |  |                     |                      |
|             | <i>N4-C45</i>  | 1.420         | 1.413 | 0.007               | <i>C29-N4-C45</i>  | 120.01            | 119.70              | 0.31                | <i>C29-N4-C45-C46</i>  | -61.03 | -55.89 | 5.14                | -59.93 |  |  |                     |                      |
|             | <i>N4-C34</i>  | 1.411         | 1.387 | 0.024               | <i>C29-N4-C34</i>  | 121.70            | 121.63              | 0.07                | <i>C29-N4-C34-C35</i>  | -32.70 | -28.92 | 3.78                | -37.34 |  |  |                     |                      |
|             | <i>C10-C8</i>  | 1.444         | 1.428 | 0.016               | <i>C10-C8-C7</i>   | 130.05            | 129.40              | 0.65                | <i>C18-C10-C8-C7</i>   | 4.23   | 4.12   | 0.11                | 7.18   |  |  |                     |                      |
|             | <i>C8-C7</i>   | 1.354         | 1.385 | 0.031               | <i>C8-C7-C6</i>    | 121.73            | 121.91              | 0.18                |                        |        |        |                     |        |  |  |                     |                      |
|             | <i>C7-C6</i>   | 1.472         | 1.450 | 0.022               | <i>C7-C6-O2</i>    | 133.44            | 134.20              | 0.76                |                        |        |        |                     |        |  |  |                     |                      |
|             | <i>C7-N3</i>   | 1.394         | 1.387 | 0.007               | <i>C8-C7-N3</i>    | 129.73            | 129.22              | 0.51                |                        |        |        |                     |        |  |  |                     |                      |
|             | <i>C6-O2</i>   | 1.198         | 1.212 | 0.014               |                    |                   |                     |                     |                        |        |        |                     |        |  |  |                     |                      |
| TPE-BMO     | <i>C23-C14</i> | 1.474         | 1.459 | 0.015               | <i>C31-C23-C14</i> | 121.83            | 122.35              | 0.52                | <i>C31-C23-C14-C15</i> | -33.63 | -33.30 | 0.33                | -30.43 |  |  |                     |                      |
|             | <i>C28-C33</i> | 1.484         | 1.452 | 0.032               | <i>C29-C28-C33</i> | 122.31            | 123.39              | 1.08                | <i>C29-C28-C33-C45</i> | -44.34 | -37.53 | 6.81                | -45.21 |  |  |                     |                      |
|             | <i>C33=C45</i> | 1.367         | 1.412 | 0.045               | <i>C28-C33-C45</i> | 122.81            | 122.73              | 0.08                | <i>C28-C33-C45-C46</i> | -11.57 | -16.53 | 4.96*               | -10.50 |  |  |                     |                      |
|             | <i>C33-C34</i> | 1.488         | 1.469 | 0.019               | <i>C33-C45-C46</i> | 122.71            | 121.49              | 1.22                | <i>C33-C45-C46-C47</i> | -39.77 | -34.77 | 5.00                | -40.16 |  |  |                     |                      |
|             | <i>C9-C7</i>   | 1.445         | 1.425 | 0.020               | <i>C33-C45-C57</i> | 120.95            | 120.77              | 0.18                | <i>C33-C45-C57-C58</i> | -49.23 | -40.16 | 9.07                | -50.21 |  |  |                     |                      |
|             | <i>C7-C6</i>   | 1.353         | 1.380 | 0.027               | <i>C28-C33-C34</i> | 115.22            | 116.10              | 0.88                | <i>C28-C33-C34-C35</i> | -47.24 | -42.53 | 4.71                | -46.66 |  |  |                     |                      |
|             | <i>C6-C5</i>   | 1.476         | 1.454 | 0.022               | <i>C17-C9-C7</i>   | 123.94            | 124.30              | 0.36                | <i>C17-C9-C7-C6</i>    | -4.51  | -4.90  | 0.39*               | -1.88  |  |  |                     |                      |
|             | <i>C6-N3</i>   | 1.395         | 1.390 | 0.005               | <i>C7-C6-C5</i>    | 121.91            | 122.15              | 0.24                |                        |        |        |                     |        |  |  |                     |                      |
|             | <i>C5-O2</i>   | 1.199         | 1.211 | 0.012               | <i>C7-C6-N3</i>    | 129.40            | 128.85              | 0.55                |                        |        |        |                     |        |  |  |                     |                      |
| DM- TPE-BMO | <i>C31-C20</i> | 1.474         | 1.463 | 0.011               | <i>C29-C31-C20</i> | 120.67            | 121.24              | 0.57                | <i>C29-C31-C20-C18</i> | 20.11  | 16.56  | 3.55                | 18.85  |  |  |                     |                      |
|             | <i>C26-C25</i> | 1.487         | 1.462 | 0.025               | <i>C27-C26-C25</i> | 121.43            | 121.81              | 0.38                | <i>C27-C26-C25-C36</i> | -45.15 | -41.02 | 4.13                | -45.24 |  |  |                     |                      |
|             | <i>C25=C36</i> | 1.365         | 1.401 | 0.036               | <i>C26-C25-C36</i> | 123.40            | 122.92              | 0.48                | <i>C26-C25-C36-C37</i> | -14.77 | -18.45 | 3.68*               | -14.23 |  |  |                     |                      |
|             | <i>C25-C65</i> | 1.486         | 1.466 | 0.020               | <i>C25-C36-C37</i> | 120.10            | 119.90              | 0.20                | <i>C25-C36-C37-C45</i> | -52.65 | -46.67 | 5.98                | -54.71 |  |  |                     |                      |
|             | <i>C15-C13</i> | 1.442         | 1.422 | 0.020               | <i>C25-C36-C51</i> | 121.01            | 120.97              | 0.04                | <i>C25-C36-C51-C59</i> | -51.86 | -42.36 | 9.50                | -49.20 |  |  |                     |                      |
|             | <i>C13-C12</i> | 1.354         | 1.381 | 0.027               | <i>C26-C25-C65</i> | 113.83            | 115.67              | 1.84                | <i>C26-C25-C65-C66</i> | -35.94 | -33.88 | 2.06                | -38.62 |  |  |                     |                      |
|             | <i>C12-C11</i> | 1.473         | 1.450 | 0.023               | <i>C16-C15-C13</i> | 122.81            | 123.34              | 0.53                | <i>C16-C15-C13-C12</i> | -4.25  | -2.25  | 2.00                | -5.36  |  |  |                     |                      |
|             | <i>C12-N5</i>  | 1.394         | 1.389 | 0.005               | <i>C13-C12-C11</i> | 122.48            | 122.58              | 0.10                |                        |        |        |                     |        |  |  |                     |                      |
|             |                | <i>C11-O2</i> | 1.198 | 1.211               | 0.013              | <i>C13-C12-N5</i> | 128.86              | 128.32              | 0.54                   |        |        |                     |        |  |  |                     |                      |

<sup>a</sup> Experimental crystallographic parameters (references [6,7])

\* The dihedral angle increases after excitation.

**Table S3.** Selected structural parameters (bond lengths in Å, bond angles in degrees and inter-ring dihedral angles in degrees) calculated for the neutral, anionic and cationic species in gas phase at the B3LYP/6-31G\*\* level of theory.  $|\Delta(A-N)|$  is the numerical difference between a structural parameter calculated for the molecule in anionic form with respect to the neutral state.  $|\Delta(C-N)|$  is the numerical difference between a structural parameter calculated for the molecule in cationic form with respect to the neutral state. The numbering of atoms is shown in Figure S7.

| Compound | BOND LENGTH    |       |        |                 |                 |       | BOND ANGLE        |        |        |                 |                 |      | DIHEDRAL ANGLE |       |        |                 |                 |      |
|----------|----------------|-------|--------|-----------------|-----------------|-------|-------------------|--------|--------|-----------------|-----------------|------|----------------|-------|--------|-----------------|-----------------|------|
|          | Neutral        | Anion | Cation | $ \Delta(A-N) $ | $ \Delta(C-N) $ |       | Neutral           | Anion  | Cation | $ \Delta(A-N) $ | $ \Delta(C-N) $ |      | Neutral        | Anion | Cation | $ \Delta(A-N) $ | $ \Delta(C-N) $ |      |
| DMA-AM   | <i>C17-C22</i> | 1.448 | 1.437  | 1.417           | 0.011           | 0.031 | <i>C17-C22-N1</i> | 123.31 | 122.48 | 122.55          | 0.83            | 0.76 | $\tau_1$       | 0.15  | 0.17   | -0.01           | 0.02            | 0.16 |
|          | <i>C22-N1</i>  | 1.295 | 1.324  | 1.322           | 0.029           | 0.027 | <i>C22-N1-C8</i>  | 120.93 | 123.76 | 120.34          | 2.83            | 0.59 | $\tau_2$       | 2.80  | 0.35   | 0.00            | 2.45            | 2.80 |
|          | <i>N1-C8</i>   | 1.388 | 1.356  | 1.352           | 0.032           | 0.036 | <i>N1-C8-C9</i>   | 117.34 | 119.01 | 117.47          | 1.67            | 0.13 | $\tau_3$       | 4.48  | 5.53   | -0.01           | 1.05*           | 4.49 |
|          | <i>C8-C10</i>  | 1.432 | 1.432  | 1.433           | 0.000           | 0.001 | <i>N1-C8-C10</i>  | 121.98 | 121.26 | 123.09          | 0.72            | 1.11 | $\tau_4$       | 2.28  | 3.67   | 0.00            | 1.39*           | 2.28 |



|                   |                |       |       |       |       |       |                    |        |        |        |       |       |          |        |        |        |        |        |
|-------------------|----------------|-------|-------|-------|-------|-------|--------------------|--------|--------|--------|-------|-------|----------|--------|--------|--------|--------|--------|
|                   | <i>C8-C9</i>   | 1.380 | 1.420 | 1.415 | 0.040 | 0.035 | <i>C8-C9-C11</i>   | 121.42 | 123.79 | 120.74 | 2.37  | 0.68  | $\tau_5$ | -1.00  | -22.31 | 0.12   | 21.31* | 1.12   |
|                   | <i>C9-C11</i>  | 1.431 | 1.402 | 1.430 | 0.029 | 0.001 | <i>C8-C9-N2</i>    | 121.75 | 118.31 | 121.30 | 3.44  | 0.45  |          |        |        |        |        |        |
|                   | <i>C9-N2</i>   | 1.373 | 1.424 | 1.336 | 0.051 | 0.037 | <i>C20-C12-N7</i>  | 121.35 | 121.76 | 121.06 | 0.41  | 0.29  |          |        |        |        |        |        |
|                   | <i>C12-N7</i>  | 1.376 | 1.421 | 1.349 | 0.045 | 0.027 | <i>C12-N7-C28</i>  | 120.29 | 120.96 | 121.01 | 0.67  | 0.72  |          |        |        |        |        |        |
| <b>TPA-BMO</b>    | <i>C24-C15</i> | 1.478 | 1.460 | 1.460 | 0.018 | 0.018 | <i>C24-C15-C16</i> | 121.22 | 122.14 | 121.25 | -0.92 | -0.03 | $\tau_1$ | 33.24  | 21.74  | 24.62  | 11.50  | 8.62   |
|                   | <i>C29-N4</i>  | 1.414 | 1.436 | 1.390 | 0.022 | 0.024 | <i>C30-C29-N4</i>  | 120.90 | 120.87 | 120.77 | 0.03  | 0.13  | $\tau_2$ | -36.59 | -58.11 | -28.81 | 21.52* | 7.78   |
|                   | <i>N4-C45</i>  | 1.424 | 1.413 | 1.427 | 0.011 | 0.003 | <i>C29-N4-C45</i>  | 120.32 | 119.04 | 120.83 | 1.28  | -0.51 | $\tau_3$ | -43.96 | -33.17 | -45.57 | 10.79  | 1.61*  |
|                   | <i>N4-C34</i>  | 1.424 | 1.413 | 1.427 | 0.011 | 0.003 | <i>C29-N4-C34</i>  | 120.30 | 119.04 | 120.82 | 1.26  | -0.52 | $\tau_4$ | -44.01 | -33.18 | -45.53 | 10.83  | 1.52*  |
|                   | <i>C10-C8</i>  | 1.448 | 1.416 | 1.443 | 0.032 | 0.005 | <i>C10-C8-C7</i>   | 129.91 | 124.60 | 128.92 | 5.31  | 0.99  | $\tau_5$ | 0.29   | -0.12  | 0.30   | 0.41   | 0.01*  |
|                   | <i>C8-C7</i>   | 1.358 | 1.398 | 1.362 | 0.040 | 0.004 | <i>C8-C7-C6</i>    | 122.32 | 130.33 | 121.89 | -8.01 | 0.43  |          |        |        |        |        |        |
|                   | <i>C7-C6</i>   | 1.479 | 1.444 | 1.490 | 0.035 | 0.011 | <i>C7-C6-O2</i>    | 133.60 | 135.34 | 133.02 | -1.74 | 0.58  |          |        |        |        |        |        |
|                   | <i>C7-N3</i>   | 1.403 | 1.401 | 1.390 | 0.002 | 0.013 | <i>C8-C7-N3</i>    | 129.15 | 127.84 | 129.58 | 1.31  | -0.43 |          |        |        |        |        |        |
|                   | <i>C6-O2</i>   | 1.202 | 1.222 | 1.197 | 0.020 | 0.005 |                    |        |        |        |       |       |          |        |        |        |        |        |
| <b>TPE-BMO</b>    | <i>C23-C14</i> | 1.480 | 1.458 | 1.466 | 0.022 | 0.014 | <i>C31-C23-C14</i> | 121.23 | 122.25 | 121.35 | -1.02 | -0.12 | $\tau_1$ | -34.56 | -20.31 | -27.22 | 14.25  | 7.34   |
|                   | <i>C28-C33</i> | 1.493 | 1.471 | 1.461 | 0.022 | 0.032 | <i>C29-C28-C33</i> | 121.65 | 122.37 | 121.85 | -0.72 | -0.20 | $\tau_2$ | -48.59 | -36.75 | -36.88 | 11.84  | 11.71  |
|                   | <i>C33-C45</i> | 1.367 | 1.391 | 1.414 | 0.024 | 0.047 | <i>C28-C33-C45</i> | 122.73 | 123.50 | 121.85 | -0.77 | 0.88  | $\tau_3$ | -12.25 | -20.13 | -24.02 | 7.88*  | 11.77* |
|                   | <i>C33-C34</i> | 1.496 | 1.494 | 1.477 | 0.002 | 0.019 | <i>C33-C45-C46</i> | 122.67 | 122.37 | 121.39 | 0.30  | 1.28  | $\tau_4$ | -49.81 | -43.24 | -40.32 | 6.57   | 9.49   |
|                   | <i>C9-C7</i>   | 1.449 | 1.421 | 1.456 | 0.028 | 0.007 | <i>C33-C45-C57</i> | 122.64 | 122.16 | 121.65 | 0.48  | 0.99  | $\tau_5$ | -49.62 | -43.35 | -40.10 | 6.27   | 9.52   |
|                   | <i>C7-C6</i>   | 1.358 | 1.389 | 1.360 | 0.031 | 0.002 | <i>C28-C33-C34</i> | 114.6  | 115.73 | 117.00 | -1.13 | -2.40 | $\tau_6$ | -45.47 | -45.16 | -41.27 | 0.31   | 4.20   |
|                   | <i>C6-C5</i>   | 1.479 | 1.450 | 1.489 | 0.029 | 0.010 | <i>C17-C9-C7</i>   | 123.78 | 124.52 | 123.68 | -0.74 | 0.10  | $\tau_7$ | -0.27  | -0.04  | -0.33  | 0.23   | 0.06*  |
|                   | <i>C6-N3</i>   | 1.403 | 1.402 | 1.393 | 0.001 | 0.010 | <i>C7-C6-C5</i>    | 122.30 | 122.85 | 121.95 | -0.55 | 0.35  |          |        |        |        |        |        |
|                   | <i>C5-O2</i>   | 1.202 | 1.218 | 1.197 | 0.016 | 0.005 | <i>C7-C6-N3</i>    | 129.17 | 128.08 | 129.55 | 1.09  | -0.38 |          |        |        |        |        |        |
| <b>DM-TPE-BMO</b> | <i>C31-C20</i> | 1.478 | 1.458 | 1.470 | 0.020 | 0.008 | <i>C29-C31-C20</i> | 121.21 | 122.20 | 121.36 | -0.99 | -0.15 | $\tau_1$ | 34.61  | 20.56  | 28.72  | 14.05  | 5.89   |
|                   | <i>C26-C25</i> | 1.492 | 1.472 | 1.461 | 0.020 | 0.031 | <i>C27-C26-C25</i> | 121.70 | 122.28 | 121.86 | -0.58 | -0.16 | $\tau_2$ | -47.58 | -36.98 | -35.94 | 10.60  | 11.64  |
|                   | <i>C25-C36</i> | 1.396 | 1.389 | 1.419 | 0.007 | 0.023 | <i>C26-C25-C36</i> | 122.75 | 123.51 | 121.80 | -0.76 | 0.95  | $\tau_3$ | -13.35 | -19.96 | -26.03 | 6.61*  | 12.68* |
|                   | <i>C25-C65</i> | 1.496 | 1.495 | 1.476 | 0.001 | 0.020 | <i>C25-C36-C37</i> | 122.60 | 122.52 | 121.23 | 0.08  | 1.37  | $\tau_4$ | -47.47 | -42.97 | -37.58 | 4.50   | 9.89   |
|                   | <i>C15-C13</i> | 1.449 | 1.420 | 1.449 | 0.029 | 0.000 | <i>C25-C36-C51</i> | 122.47 | 122.07 | 121.33 | 0.40  | 1.14  | $\tau_5$ | -48.03 | -43.93 | -38.12 | 4.10   | 9.91   |
|                   | <i>C13-C12</i> | 1.358 | 1.391 | 1.358 | 0.033 | 0.000 | <i>C26-C25-C65</i> | 114.63 | 115.68 | 117.23 | -1.05 | -2.60 | $\tau_6$ | -47.61 | -45.24 | -40.48 | 2.37   | 7.13   |
|                   | <i>C12-C11</i> | 1.479 | 1.449 | 1.487 | 0.030 | 0.008 | <i>C16-C15-C13</i> | 123.79 | 124.54 | 123.67 | -0.75 | 0.12  | $\tau_7$ | 0.26   | -0.01  | 0.28   | 0.27   | 0.02*  |
|                   | <i>C12-N5</i>  | 1.403 | 1.402 | 1.397 | 0.001 | 0.006 | <i>C13-C12-C11</i> | 122.31 | 122.87 | 122.02 | -0.56 | 0.29  |          |        |        |        |        |        |
|                   | <i>C11-O2</i>  | 1.202 | 1.219 | 1.198 | 0.017 | 0.004 | <i>C13-C12-N5</i>  | 129.16 | 128.04 | 129.50 | 1.12  | -0.34 |          |        |        |        |        |        |

\*The dihedral angle departs from zero from neutral to charged state.

**Table S4.** Vertical transition energies ( $E_{ab}^C$ ), oscillator strength ( $f$ ) and main components of the transitions (% Contribution) computed for a single molecule, three molecular dimers and a tetramer extracted from the crystal of DMA-AM (without further optimization) and shown in Figure 3(a).

| Species    | $E_{ab}^C$ /eV(nm) | $f^a$      | % Contribution                                |
|------------|--------------------|------------|-----------------------------------------------|
| Molecule 1 | 3.33 (373)         | 1.025      | H→L (99.7)                                    |
|            | 4.17 (298)         | 0.105      | H-1→L (59.2), H→L+1 (37.3)                    |
|            | 4.43 (280)         | 0.048      | H→L+2 (54.5), H-2→L (23.3)                    |
|            | 4.51 (275)         | 0.013      | H→L+1 (92.0)                                  |
|            | 4.77 (260)         | 0.146      | H→L+1 (49.2), H-1→L (28.3) , H-2→L (11.0)     |
|            | 4.93 (252)         | 0.014      | H→L+3 (76.1), H-1→L+3 (10.8)                  |
|            | 4.96 (250)         | 0.036      | H-2→L (54.1), H→L+2 (29.9)                    |
|            | 5.49 (226)         | 0.052      | H-1→L+1 (88.4)                                |
|            | 5.90 (210)         | 0.081      | H-4→L (73.7)                                  |
|            | 6.32 (196)         | 0.050      | H-1→L+1 (84.9)                                |
|            | 6.75 (184)         | 0.165      | H-6→L (78.5)                                  |
|            | 6.81 (182)         | 0.121      | H-7→L (70.4), H-2→L+2 (18.9)                  |
|            | Dimer A            | 2.74 (453) | 0.023                                         |
| 3.34 (371) |                    | 1.513      | H→L+1 (45.8), H-1→L (51.2)                    |
| 3.83 (324) |                    | 0.017      | H-2→L (58.7), H-1→L+1 (20.7), H→L+2 (17.2)    |
| 3.95 (314) |                    | 0.299      | H→L+2 (68.5), H-2→L (26.5)                    |
| 4.27 (291) |                    | 0.066      | H-2→L+1 (59.1), H-1→L+3 (12.2)                |
| 4.34 (286) |                    | 0.062      | H→L+4 (46.8), H-5→L (24.8)                    |
| 4.50 (275) |                    | 0.010      | H-6→L (55.4), H-7→L+1 (32.2)                  |
| 4.56 (272) |                    | 0.086      | H-1→L+3 (39.2), H→L+4 (29.3)                  |
| 4.65 (267) |                    | 0.086      | H-4→L+1 (39.9), H-5→L (33.4), H-1→L+5 (15.3)  |
| 4.76 (261) |                    | 0.084      | H→L+6 (33.4), H-1→L+3 (32.1)                  |
| Dimer B    | 2.51 (494)         | 0.037      | H→L (97.6)                                    |
|            | 3.17 (391)         | 0.158      | H→L+1 (62.4), H-1→L (36.6)                    |
|            | 3.31 (375)         | 1.167      | H→L+1 (30.7), H-1→L (53.5)                    |
|            | 3.41 (363)         | 0.415      | H-1→L+1 (85.1)                                |
|            | 4.13 (300)         | 0.185      | H-2→L+1 (51.5), H→L+3 (36.6)                  |
|            | 4.17 (286)         | 0.068      | H-3→L (54.7), H-1→L+2 (38.0)                  |
|            | 4.34 (286)         | 0.021      | H-4→L (33.3), H→L+4 (15.4), H→L+3 (12.7)      |
|            | 4.36 (284)         | 0.055      | H-4→L (25.6), H→L+3 (20.7), H→L+4 (18.7)      |
|            | 4.44 (279)         | 0.015      | H-1→L+3 (14.9), H→L+4 (14.3) , H-4→L (13.0)   |
|            | 4.48 (277)         | 0.019      | H-4→L (22.5), H→L+4 (15.8), H→L+5 (12.8)      |
|            | 4.51 (275)         | 0.011      | H-6→L+1 (84.5)                                |
|            | 4.74 (262)         | 0.237      | H-1→L+2 (22.5), H-3→L+1 (14.9), H-3→L (11.8)  |
|            | 4.85 (256)         | 0.019      | H→L+7 (61.3), H-4→L+1 (12.6)                  |
| Dimer C    | 2.51 (494)         | 0.037      | H→L (97.6)                                    |
|            | 3.17 (391)         | 0.158      | H→L+1 (62.4), H-1→L (36.6)                    |
|            | 3.31 (375)         | 1.168      | H-1→L (53.5), H→L+1 (30.7), H-1→L+1 (14.6)    |
|            | 3.41 (364)         | 0.419      | H-1→L+1 (84.9)                                |
|            | 4.13 (300)         | 0.185      | H-2→L+1 (51.6), H→L+3 (36.6)                  |
|            | 4.17 (297)         | 0.069      | H-3→L (54.7), H-1→L+2 (38.0)                  |
|            | 4.34 (286)         | 0.021      | H-4→L (33.1), H→L+4 (15.4), H→L+3 (12.8)      |
|            | 4.36 (284)         | 0.055      | H-4→L (25.8), H→L+3 (20.5), H→L+4 (18.5)      |
|            | 4.44 (279)         | 0.015      | H-1→L+3 (14.8), H→L+4 (14.6), H-4→L (12.8)    |
|            | 4.48 (277)         | 0.019      | H-4→L (22.7), H→L+4 (15.8) , H→L+5 (12.6)     |
|            | 4.51 (275)         | 0.011      | H-6→L+1 (84.4)                                |
|            | 4.74 (262)         | 0.237      | H-1→L+2 (22.7), H-3→L+1 (14.9) , H-3→L (11.9) |
|            | 4.85 (256)         | 0.019      | H→L+7 (60.9), H-4→L+1 (12.5)                  |

|          |            |       |                                             |
|----------|------------|-------|---------------------------------------------|
| Tetramer | 2.37 (522) | 0.018 | H→L+1 (77.4), H-1→L (9.3)                   |
|          | 2.39 (518) | 0.040 | H-1→L (69.7),H-2→L (15.2)                   |
|          | 2.70 (459) | 0.014 | H→L+2 (37.9),H-1→L+2 (23.8),H-2→L+1 (19.7)  |
|          | 3.06 (405) | 0.039 | H-2→L+2 (66.9),H-2→L+1 16.3)                |
|          | 3.19 (389) | 0.040 | H-3→L (76.6), H→L+3 (18.1)                  |
|          | 3.24 (382) | 0.213 | H→L+3 (29.2),H-1→L+2 (25.2), H-2→L+2 (22.3) |
|          | 3.29 (377) | 0.064 | H-3→L+1 (37.9),H→L+3 (23.8)                 |
|          | 3.39 (366) | 1.401 | H-1→L+3 (30.8),H→L+3 (24.6)                 |
|          | 3.43 (362) | 0.952 | H-1→L+3 (58.4)                              |

**Table S5.** Selected normal modes  $v_i$  of the ground state along with the vibrational reorganization energy and Huang-

Rhys (HR) factor calculated for the studied compounds in THF solution at the PBE0/6-31G\*\* level of theory.

| DMA-AM                      |                |      | TPA-BMO                     |                |      | TPE-BMO                     |                |       | DM-TPE-BMO                  |                |      |
|-----------------------------|----------------|------|-----------------------------|----------------|------|-----------------------------|----------------|-------|-----------------------------|----------------|------|
| $\nu_i$ (cm <sup>-1</sup> ) | $\lambda$ (eV) | HR   | $\nu_i$ (cm <sup>-1</sup> ) | $\lambda$ (eV) | HR   | $\nu_i$ (cm <sup>-1</sup> ) | $\lambda$ (eV) | HR    | $\nu_i$ (cm <sup>-1</sup> ) | $\lambda$ (eV) | HR   |
| 29                          | 1              | 0.28 | 15                          | 4              | 2.15 | 12                          | 9              | 6.04  | 9                           | 5              | 4.48 |
| 48                          | 10             | 1.68 | 20                          | 1              | 0.40 | 18                          | 54             | 24.18 | 14                          | 11             | 6.33 |
| 272                         | 1              | 0.03 | 41                          | 3              | 0.59 | 20                          | 18             | 7.25  | 17                          | 19             | 9.01 |
| 388                         | 1              | 0.02 | 98                          | 5              | 0.41 | 34                          | 37             | 8.77  | 27                          | 16             | 4.78 |
| 425                         | 1              | 0.02 | 276                         | 8              | 0.23 | 38                          | 1              | 0.21  | 33                          | 11             | 2.69 |
| 479                         | 3              | 0.05 | 318                         | 5              | 0.13 | 47                          | 1              | 0.17  | 38                          | 2              | 0.42 |
| 535                         | 3              | 0.05 | 344                         | 2              | 0.05 | 48                          | 9              | 1.51  | 39                          | 1              | 0.21 |
| 540                         | 4              | 0.06 | 414                         | 1              | 0.02 | 58                          | 3              | 0.42  | 49                          | 1              | 0.16 |
| 567                         | 2              | 0.03 | 423                         | 1              | 0.02 | 59                          | 2              | 0.27  | 56                          | 1              | 0.14 |
| 669                         | 4              | 0.05 | 430                         | 1              | 0.02 | 65                          | 1              | 0.12  | 65                          | 4              | 0.50 |
| 788                         | 1              | 0.01 | 626                         | 1              | 0.01 | 66                          | 7              | 0.85  | 85                          | 13             | 1.23 |
| 896                         | 1              | 0.01 | 630                         | 3              | 0.04 | 70                          | 16             | 1.84  | 87                          | 10             | 0.93 |
| 986                         | 4              | 0.03 | 714                         | 1              | 0.01 | 94                          | 1              | 0.09  | 99                          | 4              | 0.33 |
| 1157                        | 1              | 0.01 | 716                         | 3              | 0.03 | 103                         | 1              | 0.08  | 115                         | 4              | 0.28 |
| 1192                        | 4              | 0.03 | 764                         | 2              | 0.02 | 257                         | 4              | 0.13  | 129                         | 1              | 0.06 |
| 1203                        | 1              | 0.01 | 781                         | 1              | 0.01 | 264                         | 3              | 0.09  | 222                         | 2              | 0.07 |
| 1265                        | 1              | 0.01 | 843                         | 1              | 0.01 | 300                         | 1              | 0.03  | 245                         | 4              | 0.13 |
| 1405                        | 3              | 0.02 | 855                         | 2              | 0.02 | 325                         | 5              | 0.12  | 252                         | 3              | 0.10 |
| 1410                        | 10             | 0.06 | 956                         | 6              | 0.05 | 333                         | 1              | 0.02  | 289                         | 1              | 0.03 |
| 1431                        | 4              | 0.02 | 985                         | 1              | 0.01 | 419                         | 1              | 0.02  | 328                         | 4              | 0.10 |
| 1489                        | 1              | 0.01 | 1017                        | 1              | 0.01 | 423                         | 2              | 0.04  | 349                         | 1              | 0.02 |
| 1592                        | 2              | 0.01 | 1198                        | 2              | 0.01 | 425                         | 5              | 0.09  | 418                         | 2              | 0.04 |
| 1601                        | 22             | 0.11 | 1201                        | 5              | 0.03 | 516                         | 2              | 0.03  | 431                         | 1              | 0.02 |
| 1658                        | 37             | 0.18 | 1219                        | 1              | 0.01 | 549                         | 5              | 0.07  | 552                         | 5              | 0.07 |
| 1702                        | 3              | 0.01 | 1289                        | 1              | 0.01 | 573                         | 2              | 0.03  | 572                         | 1              | 0.01 |
| 2372                        | 12             | 0.04 | 1330                        | 1              | 0.01 | 591                         | 1              | 0.01  | 608                         | 1              | 0.01 |
|                             |                |      | 1337                        | 2              | 0.01 | 628                         | 1              | 0.01  | 630                         | 2              | 0.03 |
|                             |                |      | 1351                        | 1              | 0.01 | 634                         | 1              | 0.01  | 670                         | 1              | 0.01 |
|                             |                |      | 1423                        | 1              | 0.01 | 641                         | 1              | 0.01  | 713                         | 2              | 0.02 |
|                             |                |      | 1546                        | 1              | 0.01 | 714                         | 4              | 0.05  | 744                         | 1              | 0.01 |
|                             |                |      | 1609                        | 2              | 0.01 | 716                         | 1              | 0.01  | 749                         | 1              | 0.01 |
|                             |                |      | 1636                        | 1              | 0.00 | 745                         | 2              | 0.02  | 831                         | 1              | 0.01 |
|                             |                |      | 1659                        | 23             | 0.11 | 777                         | 1              | 0.01  | 833                         | 1              | 0.01 |
|                             |                |      | 1663                        | 3              | 0.01 | 785                         | 1              | 0.01  | 857                         | 1              | 0.01 |
|                             |                |      | 1677                        | 8              | 0.04 | 860                         | 1              | 0.01  | 957                         | 5              | 0.04 |
|                             |                |      | 1696                        | 2              | 0.01 | 867                         | 2              | 0.02  | 1169                        | 5              | 0.03 |
|                             |                |      | 1738                        | 10             | 0.05 | 956                         | 3              | 0.03  | 1201                        | 7              | 0.05 |
|                             |                |      | 1886                        | 10             | 0.04 | 1018                        | 1              | 0.01  | 1202                        | 1              | 0.01 |

**Table S6.** HOMO and LUMO energy ( $E_{\text{HOMO}}$  and  $E_{\text{LUMO}}$ ) and energy gap ( $E_{\text{H-L}}$ ) calculated at the B3LYP/6-31G\*\* level of theory in gas phase

| Compound   | $E_{\text{HOMO}}$ (eV) | $E_{\text{LUMO}}$ (eV) | $E_{\text{H-L}}$ (eV) |
|------------|------------------------|------------------------|-----------------------|
| DMA-AM     | -5.32                  | -2.12                  | 3.20                  |
| TPA-BMO    | -5.06                  | -2.28                  | 2.78                  |
| TPE-BMO    | -5.37                  | -2.35                  | 3.02                  |
| DM-TPE-BMO | -5.05                  | -2.29                  | 2.75                  |

**Table S7.** Summary of Electrochemical Parameters.

| Compound   | $\lambda_{\text{onset.abs}}$ (nm) | $E_{\text{g}}$ (eV) | $E_{\text{ox}}$ (eV) | $E_{\text{HOMO}}$ (eV) | $E_{\text{LUMO}}$ (eV) |
|------------|-----------------------------------|---------------------|----------------------|------------------------|------------------------|
| DMA-AM     | 464                               | 2.67                | 0.75                 | -5.20                  | -2.53                  |
| TPA-BMO    | 491                               | 2.53                | 0.88                 | -5.33                  | -2.80                  |
| TPE-BMO    | 435                               | 2.85                | 1.22                 | -5.67                  | -2.82                  |
| DM-TPE-BMO | 455                               | 2.73                | 0.95                 | -5.40                  | -2.67                  |

$E_{\text{g}}$  is estimated from the UV-vis absorption spectra.  $E_{\text{g}} = hc/\lambda_{\text{onset.abs}} = 1240/\lambda_{\text{onset.abs}}$

$E_{\text{HOMO}}$  is calculated from the oxidation potentials:  $E_{\text{HOMO}} = -(E^{\text{ox}} - E(\text{Fc}/\text{Fc}^+) + 4.8)$  eV

$E_{\text{LUMO}}$  is deduced from the HOMO and  $E_{\text{g}}$ :  $E_{\text{LUMO}} = E_{\text{HOMO}} - E_{\text{g}}$

**Table S8.** Harmonic vibrational wavenumbers (cm<sup>-1</sup>) calculated for S<sub>0</sub> and S<sub>1</sub> states in THF solution (PBE0/6-31G\*\*) in solution and in solid state (ONIOM: PBE0/6-31G\*\*):UFF).

| DMA-AM            |                |                |                | TPA-BMO           |                |                |                | TPE-BMO        |                |                |                | DM- TPE-BMO    |                |                |                |
|-------------------|----------------|----------------|----------------|-------------------|----------------|----------------|----------------|----------------|----------------|----------------|----------------|----------------|----------------|----------------|----------------|
| Isolated molecule |                | Cluster        |                | Isolated molecule |                | Cluster        |                | Isolated       |                | Cluster        |                | Isolated       |                | Cluster        |                |
| S <sub>0</sub>    | S <sub>1</sub> | S <sub>0</sub> | S <sub>1</sub> | S <sub>0</sub>    | S <sub>1</sub> | S <sub>0</sub> | S <sub>1</sub> | S <sub>0</sub> | S <sub>1</sub> | S <sub>0</sub> | S <sub>1</sub> | S <sub>0</sub> | S <sub>1</sub> | S <sub>0</sub> | S <sub>1</sub> |
| 32                | 31             | 54             | 102            | 14                | 15             | 80             | 78             | 12             | 12             | 66             | 68             | 10             | 9              | 65             | 66             |
| 36                | 36             | 60             | 103            | 19                | 20             | 85             | 84             | 18             | 17             | 70             | 78             | 14             | 16             | 69             | 70             |
| 50                | 51             | 67             | 111            | 24                | 26             | 87             | 86             | 20             | 21             | 77             | 80             | 18             | 18             | 71             | 71             |
| 70                | 59             | 82             | 121            | 36                | 46             | 95             | 96             | 34             | 33             | 80             | 81             | 27             | 26             | 72             | 75             |
| 82                | 81             | 91             | 139            | 38                | 49             | 99             | 101            | 38             | 38             | 86             | 87             | 33             | 36             | 79             | 81             |
| 88                | 111            | 92             | 144            | 47                | 53             | 117            | 119            | 47             | 50             | 94             | 94             | 37             | 40             | 82             | 84             |
| 113               | 113            | 104            | 150            | 60                | 65             | 121            | 124            | 48             | 59             | 96             | 96             | 40             | 44             | 84             | 87             |
| 132               | 134            | 107            | 164            | 65                | 70             | 126            | 131            | 58             | 60             | 103            | 102            | 46             | 51             | 97             | 97             |
| 135               | 134            | 114            | 199            | 72                | 81             | 131            | 133            | 59             | 66             | 110            | 111            | 49             | 57             | 104            | 100            |
| 181               | 187            | 127            | 207            | 90                | 93             | 139            | 141            | 65             | 71             | 114            | 116            | 55             | 59             | 114            | 114            |
| 189               | 190            | 144            | 245            | 97                | 106            | 142            | 143            | 66             | 73             | 122            | 124            | 59             | 71             | 119            | 118            |
| 209               | 202            | 149            | 257            | 112               | 112            | 154            | 161            | 69             | 90             | 133            | 133            | 64             | 78             | 128            | 126            |
| 261               | 259            | 158            | 270            | 133               | 132            | 165            | 168            | 91             | 95             | 135            | 133            | 85             | 87             | 133            | 134            |
| 265               | 267            | 169            | 271            | 153               | 155            | 173            | 172            | 94             | 106            | 143            | 143            | 87             | 99             | 138            | 140            |
| 272               | 279            | 200            | 305            | 160               | 160            | 181            | 191            | 103            | 110            | 149            | 147            | 94             | 101            | 147            | 147            |
| 278               | 308            | 208            | 316            | 180               | 186            | 213            | 216            | 120            | 124            | 154            | 158            | 99             | 112            | 150            | 156            |
| 339               | 331            | 238            | 354            | 201               | 212            | 220            | 225            | 135            | 136            | 174            | 177            | 106            | 114            | 153            | 159            |
| 380               | 363            | 265            | 368            | 220               | 228            | 238            | 241            | 159            | 157            | 189            | 192            | 115            | 123            | 162            | 164            |
| 388               | 374            | 273            | 380            | 242               | 244            | 251            | 249            | 175            | 178            | 193            | 197            | 130            | 135            | 172            | 172            |
| 426               | 386            | 279            | 420            | 249               | 251            | 269            | 268            | 176            | 186            | 204            | 204            | 150            | 151            | 173            | 175            |
| 433               | 414            | 296            | 429            | 276               | 276            | 285            | 285            | 180            | 194            | 220            | 223            | 156            | 163            | 182            | 184            |
| 443               | 427            | 309            | 438            | 289               | 284            | 310            | 299            | 208            | 217            | 239            | 238            | 165            | 172            | 186            | 187            |
| 479               | 462            | 381            | 478            | 318               | 317            | 326            | 326            | 231            | 235            | 251            | 252            | 174            | 178            | 195            | 190            |
| 509               | 480            | 399            | 497            | 328               | 327            | 335            | 333            | 242            | 240            | 262            | 260            | 180            | 188            | 203            | 204            |
| 527               | 509            | 428            | 518            | 344               | 345            | 358            | 354            | 258            | 259            | 270            | 266            | 187            | 195            | 210            | 216            |
| 536               | 521            | 438            | 530            | 379               | 365            | 391            | 377            | 260            | 267            | 273            | 274            | 207            | 212            | 212            | 221            |
| 539               | 532            | 445            | 539            | 414               | 414            | 419            | 418            | 264            | 274            | 279            | 281            | 215            | 222            | 228            | 228            |
| 568               | 535            | 476            | 574            | 419               | 415            | 432            | 425            | 284            | 284            | 298            | 292            | 221            | 225            | 239            | 240            |
| 581               | 568            | 487            | 594            | 420               | 417            | 435            | 434            | 300            | 305            | 311            | 311            | 245            | 240            | 244            | 243            |
| 648               | 627            | 507            | 638            | 422               | 422            | 441            | 437            | 325            | 325            | 338            | 333            | 251            | 246            | 255            | 246            |

|      |      |      |      |     |     |     |     |     |     |     |     |     |     |     |     |
|------|------|------|------|-----|-----|-----|-----|-----|-----|-----|-----|-----|-----|-----|-----|
| 669  | 636  | 533  | 642  | 430 | 427 | 451 | 443 | 333 | 331 | 343 | 337 | 254 | 252 | 258 | 258 |
| 681  | 675  | 545  | 669  | 442 | 435 | 454 | 450 | 386 | 362 | 385 | 372 | 259 | 265 | 270 | 269 |
| 726  | 724  | 575  | 728  | 448 | 449 | 459 | 459 | 395 | 404 | 407 | 406 | 279 | 277 | 279 | 272 |
| 742  | 730  | 578  | 732  | 499 | 470 | 507 | 480 | 415 | 410 | 418 | 416 | 289 | 287 | 302 | 295 |
| 789  | 787  | 638  | 794  | 521 | 505 | 529 | 515 | 416 | 413 | 425 | 422 | 297 | 300 | 322 | 318 |
| 818  | 798  | 654  | 797  | 523 | 512 | 533 | 531 | 418 | 419 | 430 | 424 | 327 | 326 | 330 | 322 |
| 838  | 828  | 675  | 822  | 540 | 548 | 552 | 560 | 419 | 423 | 435 | 434 | 337 | 333 | 352 | 351 |
| 896  | 866  | 697  | 864  | 574 | 570 | 579 | 573 | 423 | 424 | 439 | 440 | 349 | 343 | 368 | 355 |
| 963  | 880  | 737  | 888  | 574 | 572 | 586 | 579 | 425 | 430 | 449 | 444 | 363 | 354 | 376 | 362 |
| 982  | 965  | 750  | 953  | 626 | 620 | 631 | 621 | 463 | 442 | 468 | 451 | 381 | 368 | 387 | 381 |
| 982  | 968  | 798  | 958  | 628 | 622 | 633 | 628 | 487 | 465 | 497 | 475 | 404 | 403 | 412 | 411 |
| 986  | 973  | 820  | 987  | 630 | 626 | 636 | 630 | 497 | 483 | 505 | 490 | 416 | 415 | 424 | 424 |
| 1012 | 991  | 845  | 1012 | 634 | 631 | 641 | 639 | 516 | 496 | 521 | 506 | 417 | 422 | 436 | 426 |
| 1021 | 1005 | 906  | 1029 | 642 | 638 | 647 | 645 | 549 | 513 | 558 | 535 | 425 | 423 | 443 | 435 |
| 1091 | 1092 | 956  | 1099 | 649 | 650 | 654 | 656 | 564 | 545 | 566 | 561 | 427 | 431 | 447 | 445 |
| 1140 | 1120 | 981  | 1141 | 655 | 652 | 662 | 657 | 573 | 560 | 583 | 564 | 431 | 434 | 450 | 447 |
| 1142 | 1139 | 997  | 1154 | 675 | 661 | 681 | 663 | 591 | 572 | 596 | 581 | 438 | 436 | 457 | 457 |
| 1157 | 1153 | 1018 | 1163 | 699 | 693 | 703 | 695 | 598 | 597 | 600 | 597 | 470 | 457 | 473 | 461 |
| 1193 | 1177 | 1020 | 1174 | 713 | 700 | 721 | 708 | 627 | 622 | 632 | 627 | 478 | 470 | 476 | 473 |
| 1205 | 1182 | 1035 | 1205 | 714 | 703 | 723 | 717 | 628 | 623 | 633 | 628 | 482 | 476 | 481 | 480 |
| 1215 | 1204 | 1100 | 1210 | 716 | 711 | 732 | 722 | 631 | 625 | 636 | 630 | 501 | 485 | 506 | 488 |
| 1265 | 1244 | 1161 | 1252 | 737 | 722 | 742 | 730 | 634 | 627 | 640 | 632 | 527 | 512 | 531 | 522 |
| 1300 | 1284 | 1167 | 1296 | 761 | 743 | 768 | 753 | 641 | 637 | 645 | 640 | 530 | 518 | 544 | 526 |
| 1309 | 1311 | 1170 | 1323 | 763 | 749 | 768 | 756 | 645 | 643 | 651 | 649 | 552 | 541 | 559 | 546 |
| 1352 | 1329 | 1211 | 1344 | 774 | 761 | 783 | 766 | 653 | 651 | 657 | 654 | 556 | 545 | 568 | 555 |
| 1406 | 1376 | 1221 | 1378 | 781 | 781 | 787 | 792 | 658 | 655 | 661 | 658 | 572 | 557 | 575 | 571 |
| 1410 | 1390 | 1234 | 1396 | 782 | 783 | 804 | 805 | 675 | 666 | 679 | 666 | 580 | 567 | 589 | 580 |
| 1431 | 1425 | 1277 | 1419 | 843 | 811 | 853 | 824 | 691 | 687 | 695 | 693 | 588 | 587 | 594 | 587 |
| 1442 | 1435 | 1309 | 1441 | 843 | 831 | 860 | 855 | 705 | 693 | 707 | 697 | 608 | 605 | 608 | 607 |
| 1449 | 1447 | 1321 | 1457 | 852 | 843 | 864 | 858 | 714 | 703 | 718 | 710 | 629 | 625 | 634 | 629 |
| 1485 | 1463 | 1360 | 1473 | 854 | 847 | 868 | 861 | 716 | 708 | 718 | 712 | 630 | 626 | 637 | 632 |
| 1491 | 1478 | 1415 | 1486 | 859 | 849 | 876 | 870 | 718 | 712 | 724 | 716 | 639 | 634 | 644 | 641 |
| 1492 | 1481 | 1425 | 1494 | 865 | 853 | 878 | 875 | 720 | 713 | 732 | 724 | 644 | 639 | 652 | 650 |
| 1498 | 1487 | 1442 | 1502 | 878 | 858 | 890 | 875 | 745 | 729 | 749 | 738 | 647 | 645 | 654 | 653 |
| 1522 | 1497 | 1452 | 1516 | 907 | 868 | 908 | 887 | 750 | 745 | 755 | 747 | 649 | 648 | 656 | 654 |
| 1534 | 1508 | 1460 | 1524 | 918 | 888 | 925 | 890 | 768 | 755 | 776 | 762 | 655 | 650 | 663 | 660 |
| 1592 | 1527 | 1495 | 1547 | 921 | 928 | 935 | 934 | 777 | 758 | 780 | 764 | 670 | 666 | 673 | 666 |

|      |      |      |      |      |      |      |      |      |      |      |      |     |     |      |      |
|------|------|------|------|------|------|------|------|------|------|------|------|-----|-----|------|------|
| 1601 | 1530 | 1504 | 1556 | 949  | 935  | 954  | 939  | 783  | 775  | 792  | 782  | 675 | 670 | 680  | 670  |
| 1613 | 1561 | 1508 | 1560 | 953  | 949  | 960  | 952  | 785  | 785  | 797  | 799  | 702 | 694 | 709  | 701  |
| 1658 | 1566 | 1512 | 1577 | 954  | 953  | 965  | 962  | 799  | 801  | 816  | 815  | 713 | 710 | 718  | 717  |
| 1665 | 1609 | 1553 | 1617 | 956  | 965  | 970  | 965  | 840  | 821  | 850  | 830  | 717 | 712 | 725  | 720  |
| 1702 | 1665 | 1564 | 1665 | 976  | 972  | 984  | 967  | 857  | 829  | 862  | 848  | 729 | 727 | 734  | 731  |
| 2341 | 2279 | 1599 | 2311 | 982  | 980  | 994  | 1000 | 859  | 842  | 864  | 857  | 744 | 732 | 749  | 735  |
| 2372 | 2309 | 1612 | 2334 | 984  | 986  | 996  | 1002 | 864  | 855  | 867  | 858  | 748 | 744 | 755  | 750  |
| 3037 | 3044 | 1629 | 3034 | 984  | 994  | 1001 | 1006 | 866  | 857  | 869  | 861  | 757 | 750 | 759  | 752  |
| 3045 | 3052 | 1680 | 3044 | 990  | 994  | 1003 | 1008 | 867  | 858  | 876  | 865  | 772 | 753 | 777  | 756  |
| 3077 | 3109 | 1696 | 3101 | 1004 | 995  | 1011 | 1010 | 867  | 860  | 878  | 872  | 783 | 765 | 786  | 769  |
| 3101 | 3111 | 1716 | 3115 | 1004 | 1002 | 1015 | 1012 | 869  | 865  | 896  | 885  | 785 | 788 | 799  | 804  |
| 3102 | 3118 | 2363 | 3124 | 1009 | 1008 | 1021 | 1012 | 887  | 867  | 899  | 886  | 806 | 809 | 810  | 814  |
| 3185 | 3200 | 2393 | 3199 | 1012 | 1013 | 1024 | 1018 | 891  | 896  | 903  | 889  | 811 | 816 | 815  | 816  |
| 3194 | 3207 | 3035 | 3217 | 1017 | 1014 | 1025 | 1025 | 907  | 897  | 903  | 894  | 830 | 821 | 836  | 819  |
| 3205 | 3216 | 3046 | 3234 | 1017 | 1017 | 1026 | 1029 | 938  | 899  | 938  | 897  | 832 | 826 | 845  | 826  |
| 3227 | 3240 | 3081 | 3254 | 1017 | 1018 | 1028 | 1035 | 944  | 945  | 946  | 945  | 842 | 828 | 846  | 843  |
| 3253 | 3257 | 3109 | 3264 | 1038 | 1024 | 1049 | 1042 | 945  | 950  | 951  | 955  | 849 | 838 | 853  | 846  |
| 3255 | 3258 | 3116 | 3277 | 1059 | 1045 | 1068 | 1057 | 954  | 954  | 955  | 957  | 854 | 843 | 864  | 852  |
| 3606 | 3583 | 3194 | 3587 | 1062 | 1051 | 1071 | 1060 | 957  | 958  | 964  | 959  | 857 | 850 | 868  | 862  |
| 3750 | 3737 | 3208 | 3793 | 1064 | 1060 | 1073 | 1064 | 983  | 975  | 984  | 976  | 861 | 857 | 872  | 867  |
|      |      |      |      | 1065 | 1061 | 1084 | 1084 | 988  | 982  | 984  | 986  | 864 | 859 | 880  | 872  |
|      |      |      |      | 1097 | 1087 | 1098 | 1089 | 989  | 988  | 994  | 990  | 866 | 864 | 883  | 874  |
|      |      |      |      | 1115 | 1124 | 1124 | 1131 | 989  | 991  | 997  | 992  | 875 | 865 | 889  | 879  |
|      |      |      |      | 1116 | 1126 | 1130 | 1137 | 989  | 993  | 999  | 993  | 887 | 875 | 895  | 885  |
|      |      |      |      | 1150 | 1147 | 1153 | 1148 | 992  | 996  | 1005 | 1002 | 898 | 883 | 903  | 889  |
|      |      |      |      | 1155 | 1158 | 1165 | 1158 | 997  | 996  | 1007 | 1012 | 907 | 891 | 905  | 891  |
|      |      |      |      | 1180 | 1186 | 1190 | 1192 | 1010 | 1000 | 1016 | 1013 | 940 | 901 | 944  | 902  |
|      |      |      |      | 1181 | 1187 | 1204 | 1194 | 1011 | 1005 | 1018 | 1014 | 954 | 952 | 955  | 958  |
|      |      |      |      | 1198 | 1196 | 1208 | 1205 | 1011 | 1007 | 1020 | 1015 | 956 | 962 | 960  | 960  |
|      |      |      |      | 1199 | 1199 | 1217 | 1209 | 1012 | 1010 | 1021 | 1017 | 962 | 971 | 963  | 962  |
|      |      |      |      | 1200 | 1200 | 1220 | 1211 | 1013 | 1012 | 1022 | 1020 | 964 | 973 | 978  | 969  |
|      |      |      |      | 1207 | 1206 | 1228 | 1223 | 1017 | 1015 | 1023 | 1023 | 976 | 975 | 986  | 979  |
|      |      |      |      | 1219 | 1207 | 1231 | 1233 | 1018 | 1015 | 1027 | 1025 | 978 | 983 | 988  | 987  |
|      |      |      |      | 1233 | 1240 | 1246 | 1245 | 1019 | 1016 | 1030 | 1026 | 983 | 985 | 994  | 993  |
|      |      |      |      | 1289 | 1300 | 1292 | 1293 | 1023 | 1019 | 1050 | 1036 | 987 | 988 | 998  | 996  |
|      |      |      |      | 1320 | 1312 | 1328 | 1296 | 1041 | 1021 | 1051 | 1047 | 989 | 989 | 1003 | 1007 |
|      |      |      |      | 1321 | 1317 | 1331 | 1318 | 1059 | 1039 | 1059 | 1052 | 991 | 991 | 1011 | 1008 |



|      |      |      |      |      |      |      |      |      |      |      |      |
|------|------|------|------|------|------|------|------|------|------|------|------|
| 1324 | 1317 | 1334 | 1324 | 1063 | 1054 | 1069 | 1052 | 997  | 996  | 1012 | 1011 |
| 1327 | 1331 | 1335 | 1331 | 1064 | 1060 | 1072 | 1068 | 1009 | 997  | 1015 | 1015 |
| 1330 | 1335 | 1339 | 1337 | 1066 | 1063 | 1078 | 1074 | 1012 | 1005 | 1021 | 1018 |
| 1337 | 1341 | 1347 | 1351 | 1069 | 1064 | 1080 | 1076 | 1013 | 1008 | 1023 | 1019 |
| 1351 | 1348 | 1356 | 1354 | 1097 | 1091 | 1098 | 1091 | 1018 | 1015 | 1028 | 1028 |
| 1372 | 1364 | 1379 | 1364 | 1113 | 1117 | 1123 | 1128 | 1021 | 1018 | 1036 | 1031 |
| 1373 | 1371 | 1382 | 1371 | 1114 | 1122 | 1127 | 1132 | 1029 | 1021 | 1037 | 1032 |
| 1377 | 1382 | 1385 | 1381 | 1115 | 1123 | 1131 | 1135 | 1035 | 1023 | 1042 | 1033 |
| 1388 | 1395 | 1395 | 1400 | 1146 | 1148 | 1151 | 1150 | 1041 | 1026 | 1058 | 1044 |
| 1390 | 1399 | 1398 | 1406 | 1152 | 1154 | 1158 | 1155 | 1059 | 1045 | 1075 | 1065 |
| 1417 | 1409 | 1422 | 1410 | 1168 | 1166 | 1174 | 1165 | 1063 | 1053 | 1078 | 1072 |
| 1423 | 1419 | 1428 | 1425 | 1181 | 1184 | 1198 | 1199 | 1067 | 1064 | 1084 | 1080 |
| 1466 | 1468 | 1473 | 1472 | 1182 | 1185 | 1202 | 1201 | 1096 | 1085 | 1102 | 1097 |
| 1466 | 1475 | 1485 | 1483 | 1182 | 1185 | 1205 | 1208 | 1097 | 1086 | 1112 | 1097 |
| 1467 | 1485 | 1488 | 1488 | 1201 | 1201 | 1217 | 1213 | 1097 | 1090 | 1114 | 1102 |
| 1480 | 1491 | 1494 | 1500 | 1204 | 1205 | 1218 | 1217 | 1113 | 1119 | 1130 | 1134 |
| 1499 | 1500 | 1510 | 1507 | 1204 | 1206 | 1220 | 1219 | 1138 | 1144 | 1137 | 1141 |
| 1506 | 1509 | 1516 | 1510 | 1205 | 1209 | 1221 | 1221 | 1139 | 1148 | 1141 | 1145 |
| 1542 | 1517 | 1548 | 1518 | 1211 | 1212 | 1225 | 1225 | 1146 | 1148 | 1158 | 1155 |
| 1542 | 1519 | 1551 | 1529 | 1220 | 1227 | 1229 | 1231 | 1152 | 1158 | 1170 | 1164 |
| 1546 | 1531 | 1557 | 1541 | 1252 | 1270 | 1254 | 1276 | 1169 | 1164 | 1177 | 1173 |
| 1579 | 1552 | 1586 | 1556 | 1288 | 1305 | 1288 | 1297 | 1179 | 1177 | 1181 | 1176 |
| 1610 | 1557 | 1615 | 1572 | 1308 | 1315 | 1315 | 1313 | 1179 | 1177 | 1190 | 1185 |
| 1636 | 1592 | 1643 | 1613 | 1320 | 1324 | 1323 | 1329 | 1181 | 1185 | 1196 | 1191 |
| 1657 | 1625 | 1664 | 1626 | 1321 | 1328 | 1328 | 1333 | 1198 | 1193 | 1202 | 1198 |
| 1659 | 1637 | 1667 | 1631 | 1323 | 1331 | 1336 | 1342 | 1200 | 1199 | 1203 | 1204 |
| 1663 | 1642 | 1672 | 1644 | 1334 | 1336 | 1337 | 1344 | 1202 | 1203 | 1204 | 1208 |
| 1672 | 1645 | 1682 | 1658 | 1336 | 1342 | 1342 | 1348 | 1204 | 1205 | 1212 | 1211 |
| 1677 | 1651 | 1685 | 1660 | 1339 | 1353 | 1346 | 1349 | 1211 | 1212 | 1220 | 1216 |
| 1690 | 1662 | 1695 | 1665 | 1340 | 1353 | 1348 | 1352 | 1213 | 1213 | 1232 | 1226 |
| 1696 | 1668 | 1701 | 1676 | 1355 | 1362 | 1361 | 1364 | 1213 | 1213 | 1243 | 1238 |
| 1738 | 1678 | 1747 | 1687 | 1368 | 1383 | 1376 | 1380 | 1220 | 1225 | 1250 | 1244 |
| 1885 | 1811 | 1923 | 1866 | 1378 | 1385 | 1382 | 1387 | 1254 | 1274 | 1262 | 1275 |
| 3082 | 3065 | 3088 | 3063 | 1379 | 1387 | 1383 | 1394 | 1288 | 1304 | 1298 | 1305 |
| 3156 | 3131 | 3168 | 3144 | 1379 | 1390 | 1388 | 1397 | 1308 | 1314 | 1309 | 1315 |
| 3195 | 3194 | 3208 | 3194 | 1383 | 1398 | 1390 | 1403 | 1315 | 1323 | 1319 | 1322 |
| 3209 | 3196 | 3214 | 3196 | 1417 | 1408 | 1421 | 1413 | 1320 | 1327 | 1323 | 1331 |

|      |      |      |      |      |      |      |      |      |      |      |      |
|------|------|------|------|------|------|------|------|------|------|------|------|
| 3211 | 3199 | 3214 | 3222 | 1423 | 1420 | 1429 | 1426 | 1321 | 1330 | 1328 | 1335 |
| 3211 | 3206 | 3218 | 3225 | 1455 | 1425 | 1463 | 1454 | 1322 | 1332 | 1329 | 1336 |
| 3211 | 3217 | 3229 | 3227 | 1465 | 1467 | 1478 | 1488 | 1323 | 1333 | 1335 | 1338 |
| 3215 | 3227 | 3231 | 3232 | 1466 | 1472 | 1486 | 1488 | 1329 | 1335 | 1338 | 1341 |
| 3216 | 3227 | 3232 | 3240 | 1473 | 1487 | 1496 | 1490 | 1332 | 1341 | 1342 | 1350 |
| 3217 | 3231 | 3233 | 3243 | 1488 | 1490 | 1499 | 1495 | 1334 | 1346 | 1344 | 1352 |
| 3218 | 3232 | 3235 | 3244 | 1489 | 1494 | 1502 | 1500 | 1338 | 1349 | 1354 | 1356 |
| 3222 | 3234 | 3240 | 3249 | 1490 | 1503 | 1506 | 1509 | 1352 | 1360 | 1363 | 1365 |
| 3229 | 3235 | 3246 | 3253 | 1535 | 1506 | 1541 | 1512 | 1363 | 1368 | 1376 | 1374 |
| 3229 | 3242 | 3247 | 3255 | 1541 | 1516 | 1546 | 1523 | 1376 | 1377 | 1380 | 1383 |
| 3230 | 3242 | 3250 | 3256 | 1542 | 1526 | 1548 | 1531 | 1378 | 1383 | 1383 | 1384 |
| 3233 | 3242 | 3255 | 3258 | 1545 | 1528 | 1549 | 1534 | 1380 | 1385 | 1387 | 1396 |
| 3234 | 3245 | 3262 | 3265 | 1576 | 1532 | 1579 | 1537 | 1382 | 1398 | 1392 | 1402 |
| 3237 | 3246 | 3263 | 3273 | 1607 | 1544 | 1610 | 1553 | 1416 | 1410 | 1421 | 1413 |
| 3238 | 3248 | 3268 | 3279 | 1633 | 1564 | 1629 | 1563 | 1422 | 1419 | 1441 | 1438 |
| 3239 | 3248 | 3269 | 3283 | 1642 | 1575 | 1641 | 1585 | 1456 | 1447 | 1467 | 1473 |
| 3240 | 3251 | 3286 | 3285 | 1651 | 1618 | 1655 | 1628 | 1465 | 1468 | 1469 | 1484 |
| 3247 | 3252 | 3296 | 3308 | 1652 | 1625 | 1659 | 1631 | 1466 | 1475 | 1470 | 1485 |
|      |      |      |      | 1662 | 1628 | 1664 | 1633 | 1467 | 1483 | 1484 | 1488 |
|      |      |      |      | 1668 | 1638 | 1673 | 1641 | 1469 | 1484 | 1487 | 1489 |
|      |      |      |      | 1676 | 1653 | 1682 | 1659 | 1474 | 1487 | 1490 | 1491 |
|      |      |      |      | 1677 | 1654 | 1684 | 1662 | 1484 | 1489 | 1492 | 1494 |
|      |      |      |      | 1679 | 1668 | 1686 | 1672 | 1485 | 1489 | 1496 | 1497 |
|      |      |      |      | 1684 | 1670 | 1690 | 1673 | 1489 | 1496 | 1500 | 1503 |
|      |      |      |      | 1694 | 1679 | 1698 | 1676 | 1496 | 1497 | 1505 | 1508 |
|      |      |      |      | 1739 | 1689 | 1750 | 1697 | 1496 | 1497 | 1509 | 1509 |
|      |      |      |      | 1888 | 1811 | 1918 | 1854 | 1510 | 1501 | 1523 | 1516 |
|      |      |      |      | 3082 | 3071 | 3115 | 3101 | 1510 | 1508 | 1530 | 1522 |
|      |      |      |      | 3156 | 3139 | 3192 | 3171 | 1538 | 1510 | 1551 | 1524 |
|      |      |      |      | 3195 | 3193 | 3205 | 3194 | 1545 | 1523 | 1555 | 1535 |
|      |      |      |      | 3207 | 3200 | 3209 | 3195 | 1563 | 1531 | 1568 | 1541 |
|      |      |      |      | 3207 | 3202 | 3214 | 3211 | 1567 | 1551 | 1571 | 1563 |
|      |      |      |      | 3207 | 3216 | 3217 | 3213 | 1576 | 1558 | 1587 | 1563 |
|      |      |      |      | 3210 | 3216 | 3218 | 3218 | 1606 | 1560 | 1612 | 1568 |
|      |      |      |      | 3211 | 3217 | 3219 | 3222 | 1628 | 1562 | 1632 | 1572 |
|      |      |      |      | 3213 | 3217 | 3223 | 3227 | 1636 | 1583 | 1643 | 1603 |
|      |      |      |      | 3213 | 3223 | 3223 | 3232 | 1641 | 1607 | 1646 | 1612 |

|      |      |      |      |      |      |      |      |
|------|------|------|------|------|------|------|------|
| 3213 | 3223 | 3225 | 3234 | 1647 | 1613 | 1651 | 1618 |
| 3213 | 3224 | 3228 | 3234 | 1655 | 1620 | 1662 | 1635 |
| 3216 | 3225 | 3228 | 3237 | 1667 | 1638 | 1675 | 1638 |
| 3221 | 3230 | 3230 | 3237 | 1676 | 1655 | 1689 | 1663 |
| 3222 | 3230 | 3233 | 3241 | 1683 | 1657 | 1691 | 1667 |
| 3222 | 3231 | 3235 | 3242 | 1686 | 1667 | 1692 | 1673 |
| 3223 | 3232 | 3236 | 3246 | 1689 | 1675 | 1695 | 1681 |
| 3228 | 3233 | 3239 | 3250 | 1695 | 1681 | 1703 | 1687 |
| 3228 | 3237 | 3239 | 3252 | 1739 | 1689 | 1750 | 1706 |
| 3229 | 3238 | 3246 | 3255 | 1887 | 1807 | 1919 | 1861 |
| 3229 | 3240 | 3246 | 3260 | 3045 | 3058 | 3050 | 3068 |
| 3231 | 3242 | 3247 | 3260 | 3045 | 3059 | 3064 | 3074 |
| 3234 | 3243 | 3254 | 3261 | 3083 | 3068 | 3102 | 3084 |
| 3236 | 3243 | 3255 | 3266 | 3120 | 3135 | 3128 | 3152 |
| 3236 | 3244 | 3261 | 3270 | 3120 | 3140 | 3143 | 3154 |
| 3236 | 3244 | 3267 | 3273 | 3156 | 3141 | 3179 | 3163 |
| 3249 | 3246 | 3281 | 3279 | 3185 | 3192 | 3181 | 3194 |
|      |      |      |      | 3186 | 3197 | 3188 | 3196 |
|      |      |      |      | 3196 | 3198 | 3210 | 3205 |
|      |      |      |      | 3205 | 3198 | 3220 | 3215 |
|      |      |      |      | 3210 | 3200 | 3222 | 3234 |
|      |      |      |      | 3211 | 3211 | 3224 | 3234 |
|      |      |      |      | 3212 | 3217 | 3231 | 3237 |
|      |      |      |      | 3212 | 3219 | 3235 | 3241 |
|      |      |      |      | 3214 | 3223 | 3237 | 3241 |
|      |      |      |      | 3217 | 3224 | 3240 | 3247 |
|      |      |      |      | 3217 | 3226 | 3241 | 3248 |
|      |      |      |      | 3220 | 3229 | 3242 | 3253 |
|      |      |      |      | 3222 | 3231 | 3248 | 3254 |
|      |      |      |      | 3223 | 3232 | 3252 | 3255 |
|      |      |      |      | 3224 | 3235 | 3255 | 3260 |
|      |      |      |      | 3227 | 3235 | 3257 | 3260 |
|      |      |      |      | 3227 | 3238 | 3259 | 3261 |
|      |      |      |      | 3231 | 3238 | 3260 | 3263 |
|      |      |      |      | 3233 | 3241 | 3263 | 3265 |
|      |      |      |      | 3234 | 3243 | 3269 | 3273 |
|      |      |      |      | 3235 | 3243 | 3275 | 3285 |

|      |      |      |      |
|------|------|------|------|
| 3237 | 3244 | 3282 | 3300 |
| 3248 | 3248 | 3300 | 3303 |
| 3249 | 3256 | 3331 | 3340 |
| 3249 | 3256 | 3369 | 3428 |

---
